# Supplementary material for: Towards atomically precise luminescent Ag2S clusters separable by thin layer chromatography
Source: Royal Society of Chemistry journal article supplement (doi:10.1039/c7tc05858f), 2018-01-01
Supplement: c7tc05858f1.pdf [file c7tc05858f1.pdf]

## Electronic supplementary information (ESI):

### Towards atomically precise luminescent Ag<sub>2</sub>S clusters separable by thin layer chromatography

C. K. Manju, Jyoti Sarita Mohanty, Depanjan Sarkar, Sudhakar Chennu and Thalappil Pradeep<sup>a\*</sup>

*DST Unit of Nanoscience (DST UNS) and Thematic Unit of Excellence,  
Department of Chemistry, Indian Institute of Technology Madras,  
Chennai 600036, India.*

## Table of contents

| No        | Description                                                             | Page No |
|-----------|-------------------------------------------------------------------------|---------|
| <b>S1</b> | Full range MALDI MS of clusters synthesized at different temperature    | 2       |
| <b>S2</b> | MALDI MS of solvent dependent cluster synthesis                         | 3       |
| <b>S3</b> | MALDI MS of Ag <sub>2</sub> S-70 and TLC separated Ag <sub>2</sub> S-70 | 4       |
| <b>S4</b> | ESI MS of Ag <sub>2</sub> S-60 and TLC separated clusters               | 5       |
| <b>S5</b> | TEM images of TLC separated Ag <sub>2</sub> S-60                        | 6       |
| <b>S6</b> | TG data of Ag <sub>2</sub> S-80                                         | 7       |
| <b>S7</b> | EDS spectrum of Ag <sub>2</sub> S-80 cluster                            | 8       |
| <b>S8</b> | Jacobian Correction                                                     | 8       |
| <b>S9</b> | Cluster assignment                                                      | 9       |

## Supporting information 1

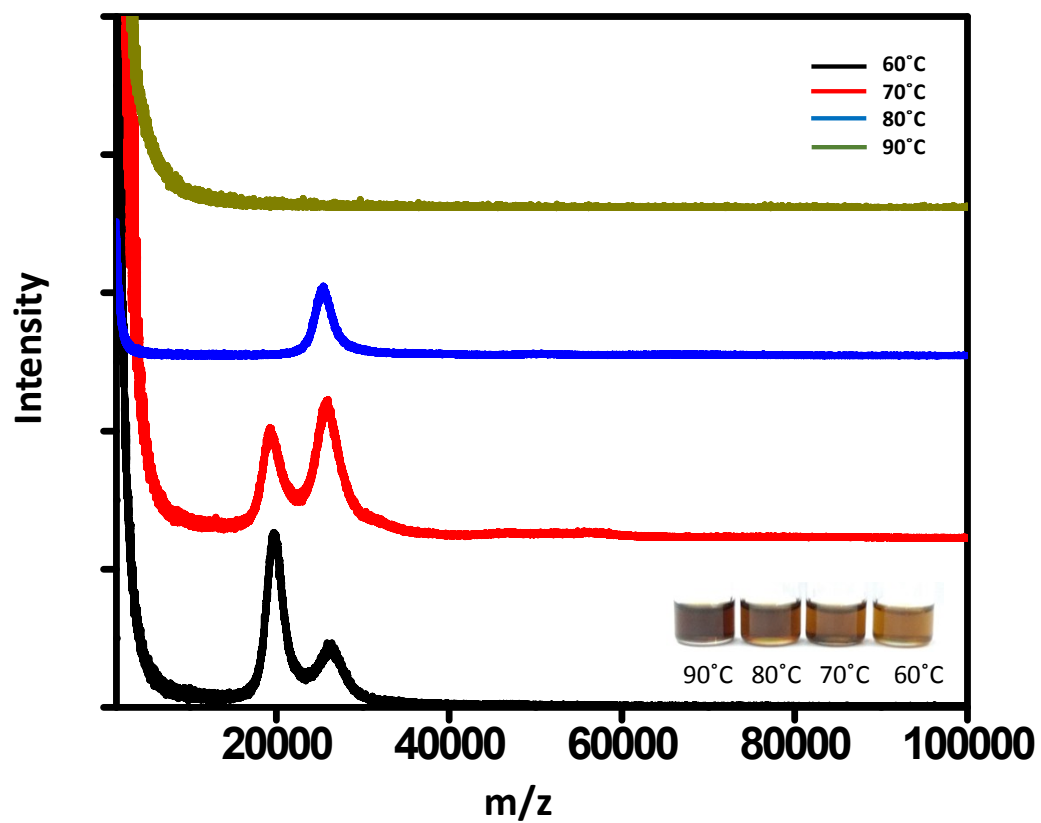

Fig. S1. Full range MALDI MS spectra of  $\text{Ag}_2\text{S}$  clusters synthesized at different temperature.

## Supporting information 2

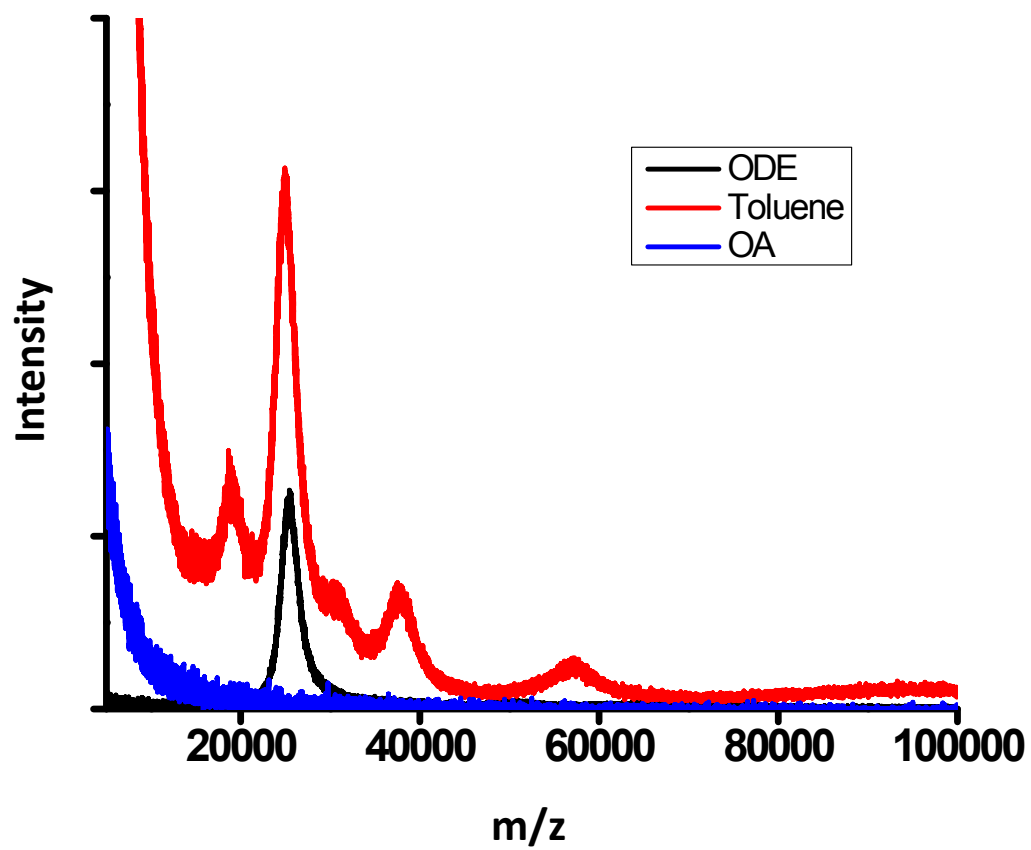

**Fig. S2** MALDI MS of solvent dependent  $\text{Ag}_2\text{S}$  cluster formation. Octadecene (ODE) is only one species. Use of toluene gives multiple population and oleylamine (OA) resulted in bigger quantum dots.

### Supporting information 3

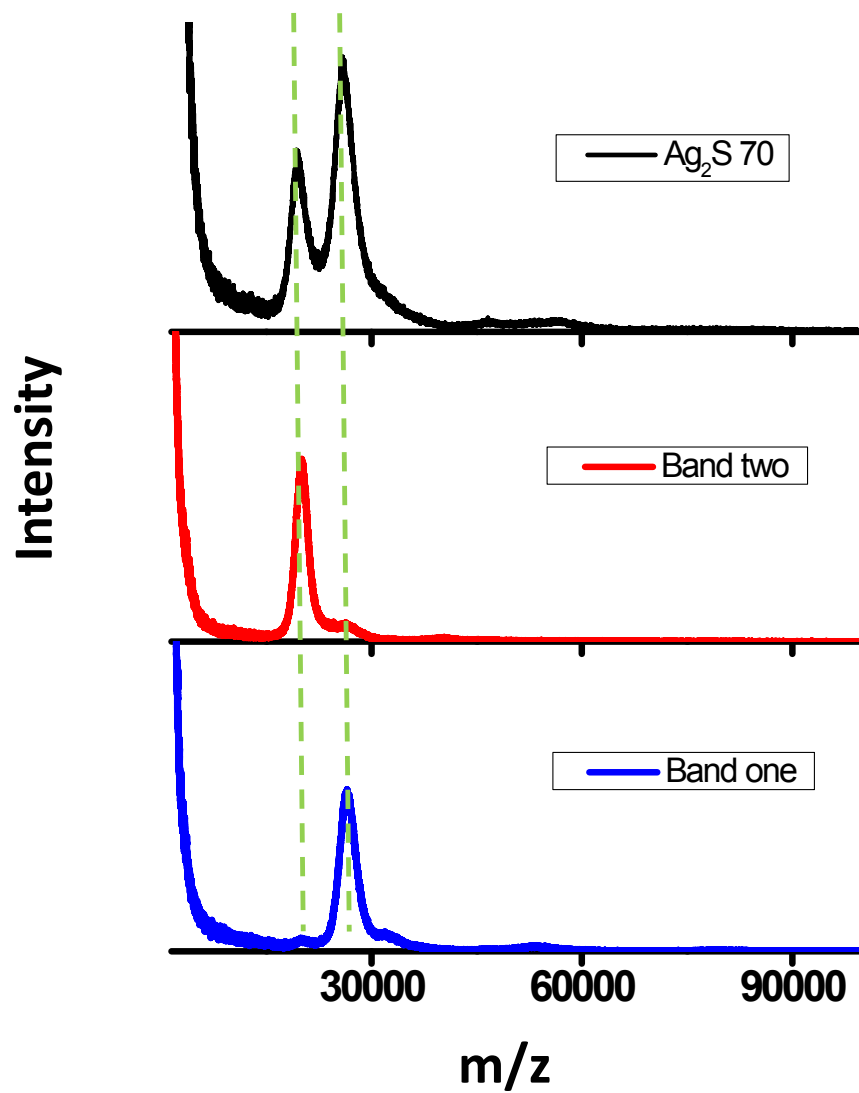

Fig. S3 MALDI MS of parent Ag<sub>2</sub>S-70 and TLC separated bands.

## Supporting information 4

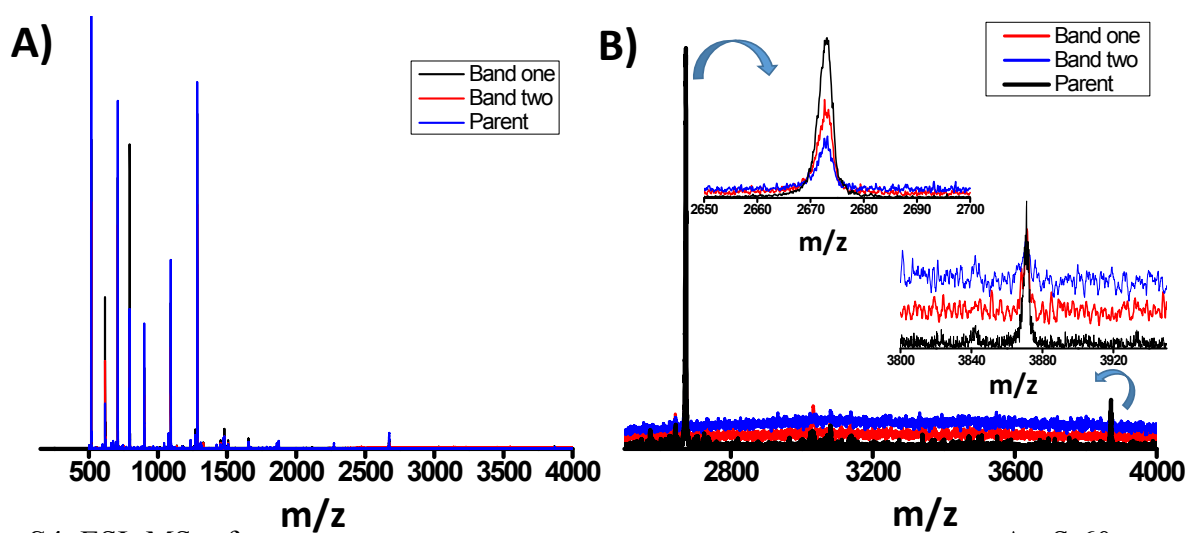

**Fig. S4** ESI MS of  $\text{Ag}_2\text{S-60}$  and TLC separated clusters. Cesium acetate was used as an ionization enhancer as the cluster was not having any charge. (A) Shows full range mass spectra where cesium clusters are seen in the lower range (below 2000  $m/z$ ). (B) MS shows cluster fragments in the positive mode. Specific regions are expanded in the inset.

## Supporting information 5

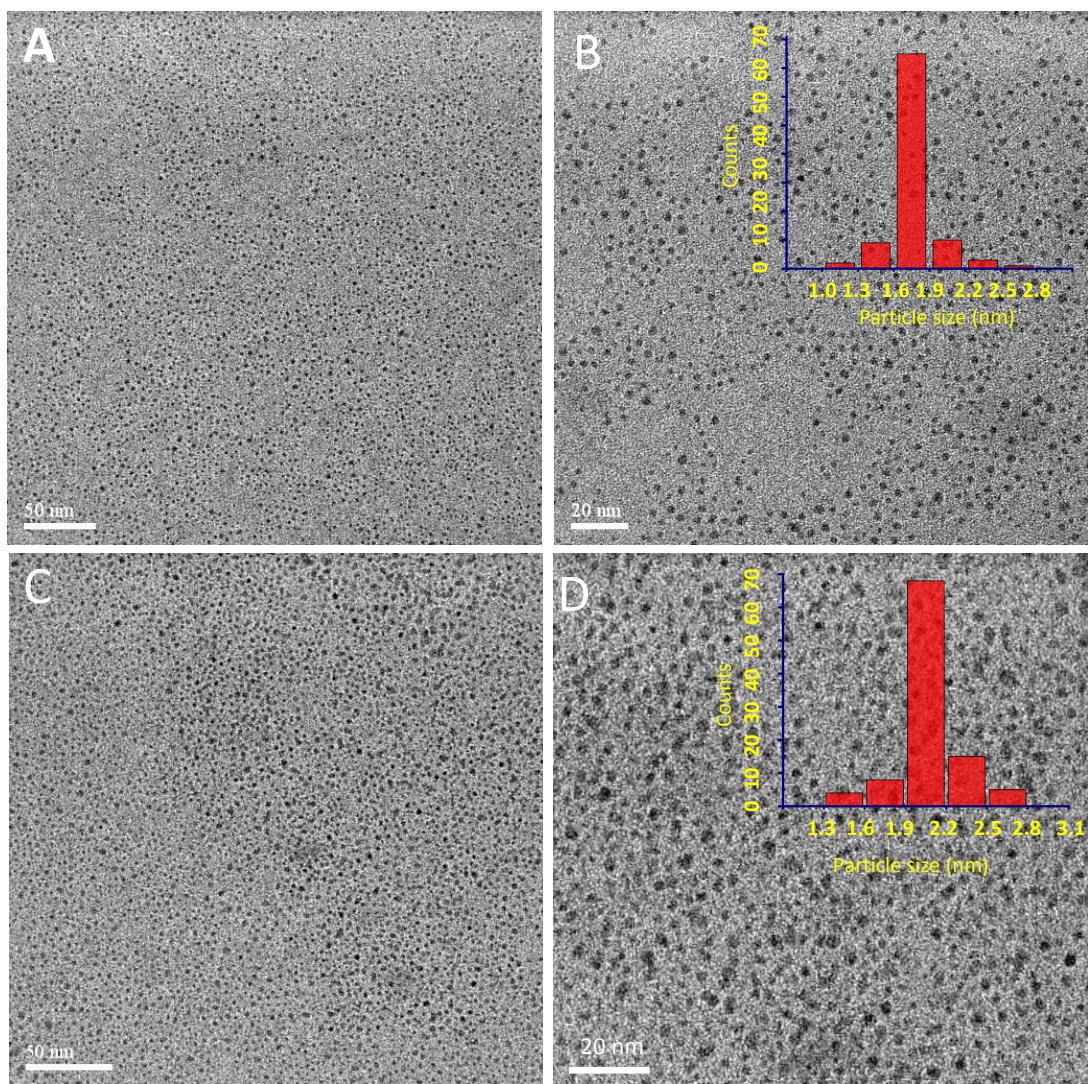

**Fig. S5** TEM images of TLC separated  $\text{Ag}_2\text{S-60}$  clusters. (A) and (B) Band two and (C) and (D) band one, at different magnifications.

## Supporting information 6

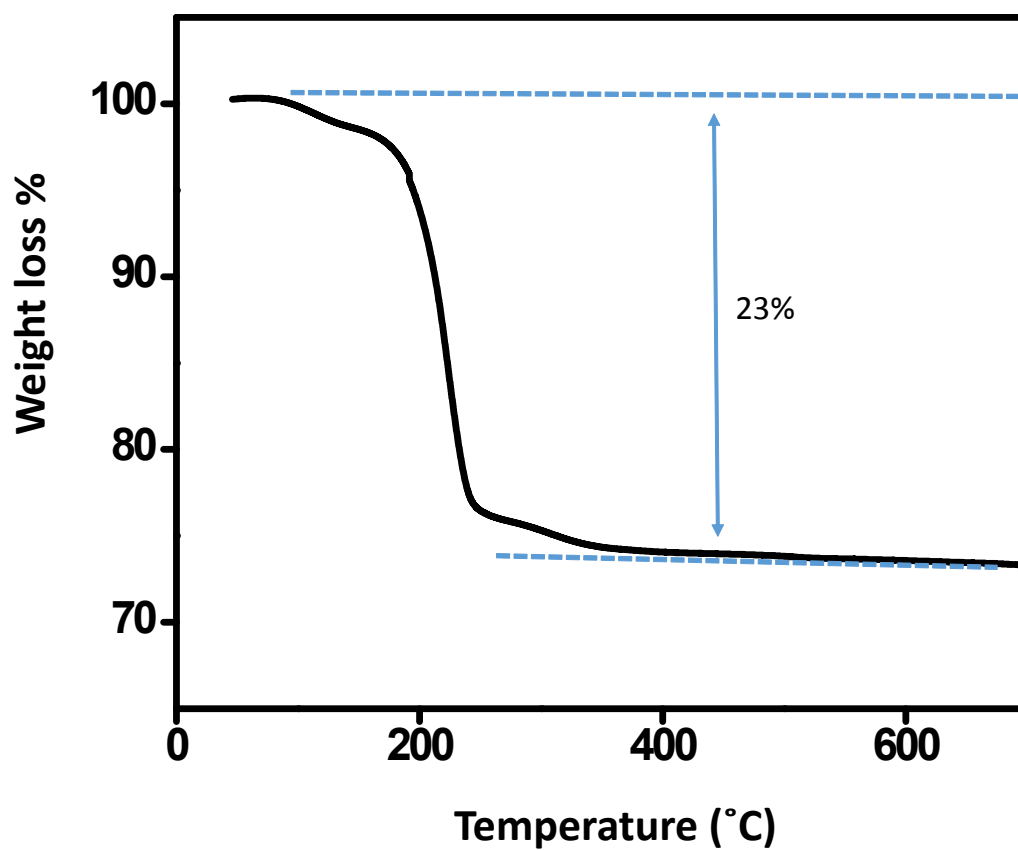

Fig. S6 TG data of Ag<sub>2</sub>S-80 showing 23% weight loss due to the protecting BBSH group.

## Supporting information 7

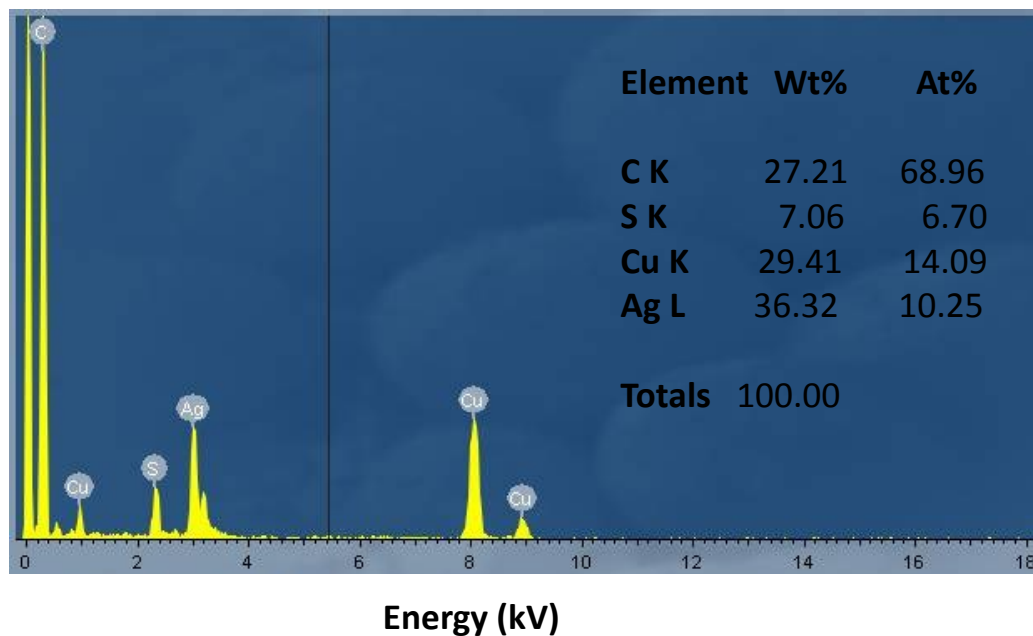

**Fig S7.** EDS spectrum of purified Ag<sub>2</sub>S-80 cluster. Ag:S ratio of 1:0.65.

## Supporting information 8

### Jacobian correction:

This uses the equations

$$E=hc/\lambda$$

$$f(E) dE = f(\lambda) d(\lambda)$$

$$f(E) = f(\lambda) (dE/d\lambda) = f(\lambda) (d/dE)(hc/E)$$

$$= f(\lambda) (hc/E^2)$$



The factor  $(hc/E^2)$ , known as the Jacobian factor, is used to scale the signal values along with wavelength conversion [wavelength (in nm) =  $1239.8/(\text{energy (eV)})$ ]. Normally, it is plotted by multiplying the absorbance value with the factor  $1/W^2$ , where W is the value in electronvolts corresponding to the wavelength in nanometers

## Supporting information 9

### Cluster assignment:

MALDI MS peak for  $\text{Ag}_2\text{S}$ -80 = 25450 Da

TG showed 23% weight loss.

This weight loss is due to organic ligand.

$$\begin{aligned} 23\% \text{ of } 25450 &= (23 \times 25450)/100 \\ &= 5854 = \text{Total ligand mass} \end{aligned}$$

$$\text{Mass of one SBB ligand} = 179.41$$

$$\text{No of ligands} = 5854/179.41$$

$$\sim 32$$

Cluster core mass is calculated by subtracting the total ligand mass from cluster mass

$$\text{This is} = 25450 - 5854 = 19596 \text{ Da}$$

This cluster core mass can contain 79  $\text{Ag}_2\text{S}$  units

$$\text{Mass of } \text{Ag}_2\text{S} = 248$$

$$19596/248 \approx 79$$

From this, the cluster core can be assigned as  $\text{Ag}_{158}\text{S}_{79}$ . Hence the total molecular formula may be given as  $(\text{Ag}_{158}\text{S}_{79})\text{SBB}_{32}$ . This is in agreement with the Ag:S ratio of 1:0.65 obtained from EDS measurement.
